# Supplementary material
Source: HighWire-hosted journal article supplement (https://jnis.bmj.com/content/11/5/489)
Supplement: inline-supplementary-material-1 [file inline-supplementary-material-1.docx]

Appendix 1. location of aneurysms of included studies

| **Author** | **Location of aneurysms** | |
| --- | --- | --- |
| **SAC** | **Non-stented** |
| Cai 2016 | PComA:29  AComA:5  ICA:8  MCA:4  ophthalmic:7  ACA:3  Posterior circulation:9 | PComA:11  AComA:11  ICA:4  MCA:2  ophthalmic:2  ACA:1  Posterior circulation:1 |
| Fan 2016 | AcomA: 63 | AcomA: 159 |
| Hyun 2018 | PComA:11  AComA: 7  ICA:12  MCA: 4  ACA: 5  Posterior circulation: 16 | Anterior circulation:338  Posterior circulation:56 |
| Liu 2017 | Anterior circulation:101  Posterior circulation:12 | Anterior circulation:155  Posterior circulation:11 |
| Rohan 2013 | PComA:11  AComA: 2  ICA:10  MCA:3  Basilar : 15  Vertebral:3 | PComA:10  AComA: 9  ICA:9  MCA:1  Basilar : 8  Vertebral:3 |
| Yang 2015 | NR | NR |
| Zhao 2016 | Anterior circulation:17  Posterior circulation:6 | Anterior circulation:89  Posterior circulation:19 |
| Zuo 2018 | PComA:69  AComA: 25  ACA:1  ICA:13  MCA:14  Posterior circulation:11 | PComA:69  AComA: 25  ACA:1  ICA:13  MCA:14  Posterior circulation:11 |
